# Supplementary material
Source: PubMed Central journal article supplement (PMC3501052)
Supplement: supp_M112.417477_jbc.M112.417477-1.pdf [file supp_M112.417477_jbc.M112.417477-1.pdf]

**Supplemental Table 1: Abbreviations and accession numbers of proteins used in phylogenetic analyses**

| <b>Organism</b>                | <b>Annotation</b> | <b>Abbreviation</b> | <b>Accession #</b> | <b>Gene Location</b> |
|--------------------------------|-------------------|---------------------|--------------------|----------------------|
| Homo sapien                    | HsELMOD1          | ELMOD1              | NP_061182          |                      |
| Homo sapien                    | HsELMOD2          | ELMOD2              | NP_714913          |                      |
| Homo sapien                    | HsELMOD3          | ELMOD3              | NP_115589          |                      |
| Homo sapien                    | HsELMO1           | ELMO1               | NP_055615          |                      |
| Homo sapien                    | HsELMO2           | ELMO2               | NP_877496          |                      |
| Homo sapien                    | HsELMO3           | ELMO3               | NP_078988          |                      |
| Danio rerio                    | DrELMOW           | ELMOD_B             | NP_001074150.1     |                      |
| Danio rerio                    | DrELMOX           | ELMOD_A             | XP_691971.4        |                      |
| Danio rerio                    | DrELMOY           | ELMO1               | NP_998256.1        |                      |
| Nematostella vectensis         | NvELMOX           | ELMOD_A             | XP_001628072       |                      |
| Nematostella vectensis         | NvELMOY           | ELMOD3              | XP_001623228       |                      |
| Nematostella vectensis         | NvELMOZ           | ELMO                | XP_001627551       |                      |
| Monosiga brevicollis           | MbELMOZ           | ELMOD               | XP_001745572       |                      |
| Cryptococcus neoformans        | CnELMOZ           | ELMO                | CNAG_05930.2       |                      |
| Batrachochytrium dendrobatidis | BdELMOY           | ELMOD               | BDEG_00507.1       |                      |
| Batrachochytrium dendrobatidis | BdELMOZ           | ELMO                | BDEG_04078.1       |                      |
| Drosophila melanogaster        | DmELMOY           | ELMOD               | NP_649695          |                      |
| Drosophila melanogaster        | DmELMOZ           | ELMO                | NP_609548          |                      |
| Caenorhabditis elegans         | CeELMOY           | ELMOD3              | NP_497699          |                      |
| Dictyostelium discoideum       | DdELMOA           | ElmoA               | XP_642091          |                      |
| Dictyostelium discoideum       | DdELMOB           | ElmoB               | XP_641287          |                      |
| Dictyostelium discoideum       | DdELMOC           | ElmoC               | XP_639274          |                      |
| Dictyostelium discoideum       | DdELMOD           | ElmoD               | XP_640972          |                      |
| Dictyostelium discoideum       | DdELMOE           | ElmoE               | XP_641578          |                      |
| Dictyostelium discoideum       | DdELMOF           | ElmoF               | XP_647117          |                      |
| Trichomonas vaginalis          | TvELMOY           | ELMOD3_A            | XP_001581069       |                      |
| Trichomonas vaginalis          | TvELMOZ           | ELMOD3_B            | XP_001318953       |                      |
| Trypanosoma brucei             | TbELMOY           | ELMOD_A             | XP_803577          |                      |
| Trypanosoma brucei             | TbELMOZ           | ELMOD3              | XP_822839          |                      |
| Leishmania major               | LmELMOX           | ELMOD_B             | XP_001684191       |                      |
| Leishmania major               | LmELMOY           | ELMOD_A             | XP_001682746       |                      |
| Leishmania major               | LmELMOZ           | ELMOD3              | XP_001686726       |                      |

|                           |          |          |                |                                             |
|---------------------------|----------|----------|----------------|---------------------------------------------|
| Naegleria gruberi         | NgELMOU  | ELMOD_A  | XP_002680121   |                                             |
| Naegleria gruberi         | NgELMOV  | ELMOD_B  | XP_002676984   |                                             |
| Naegleria gruberi         | NgELMOW  | ELMOD3_B | XP_002675911   |                                             |
| Naegleria gruberi         | NgELMOX  | ELMOD_C  | XP_002670995   |                                             |
| Naegleria gruberi         | NgELMOY  | ELMOD_D  | XP_002668667   |                                             |
| Naegleria gruberi         | NgELMOZ  | ELMOD3_A | XP_002678333   |                                             |
| Arabidopsis thaliana      | AtELMOU  | ELMOD_A  | NP_567097      |                                             |
| Arabidopsis thaliana      | AtELMOV  | ELMOD_C  | NP_564897      |                                             |
| Arabidopsis thaliana      | AtELMOW  | ELMOD_F  | NP_566211      |                                             |
| Arabidopsis thaliana      | AtELMOX  | ELMOD_E  | NP_171859      |                                             |
| Arabidopsis thaliana      | AtELMOY  | ELMOD_D  | NP_189926      |                                             |
| Arabidopsis thaliana      | AtELMOZ  | ELMOD_B  | NP_566027      |                                             |
| Physcomitrella patens     | PpELMOZ  | ELMOD    | XP_001756777   |                                             |
| Chlamydomonas reinhardtii | CrELMOY  | ELMOD3   |                | Chlre4 150490 Chlre2_kg.scaffold_32000043   |
| Chlamydomonas reinhardtii | CrELMOZ  | ELMOD_A  |                | Chlre4 21823 fgenes1_pg.C_scaffold_80000050 |
| Ostreococcus tauri        | OtELMOZ  | ELMOD_A  | XP_003078509   |                                             |
| Toxoplasma gondii         | TxgELMOX | ELMOD_B  | EEE21379       |                                             |
| Toxoplasma gondii         | TxgELMOY | ELMOD_A  | EEE22446       |                                             |
| Toxoplasma gondii         | TxgELMOZ | ELMOD_C  | EEE29665       |                                             |
| Tetrahymena thermophila   | TtELMOW  | ELMOD_A  | XP_001014395.2 |                                             |
| Tetrahymena thermophila   | TtELMOX  | ELMOD3_B | XP_001033010.1 |                                             |
| Tetrahymena thermophila   | TtELMOY  | ELMOD_B  | XP_001026931.1 |                                             |
| Tetrahymena thermophila   | TtELMOZ  | ELMOD3_A | XP_001024802.1 |                                             |
| Phytophthora sojae        | PsELMOW  | ELMOD_C  |                | Physo1_1 137612 estExt_fgenes1_pg.C_550103  |
| Phytophthora sojae        | PsELMOX  | ELMOD_B  |                | Physo1_1 128030 estExt_fgenes1_pg.C_30239   |
| Phytophthora sojae        | PsELMOY  | ELMOD_A  |                | Physo1_1 128030 estExt_fgenes1_pg.C_30239   |
| Phytophthora sojae        | PsELMOZ  | ELMOD3   |                | Physo1_1 133225 estExt_fgenes1_pg.C_240194  |
| Amphimedon queenslandica  | AqELMOX  | ELMOD3   | XP_003384642   |                                             |
| Amphimedon queenslandica  | AqELMOY  | ELMOD_A  | XP_003387436   |                                             |
| Amphimedon queenslandica  | AqELMOZ  | ELMO     | XP_003386618   |                                             |
| Capsaspora owczarzaki     | CoELMOX  | ELMOD_A  | EFW40932       |                                             |
| Capsaspora owczarzaki     | CoELMOY  | ELMOD_B  | EFW39689       |                                             |
| Capsaspora owczarzaki     | CoELMOZ  | ELMO     | EFW44340       |                                             |
| Thecamonas trahens        | TtrELMOV | ELMOD_D  | AMSG_00305.1   |                                             |
| Thecamonas trahens        | TtrELMOW | ELMOD_C  | AMSG_09134.1   |                                             |

|                               |          |         |                |                                            |
|-------------------------------|----------|---------|----------------|--------------------------------------------|
| <i>Thecamonas trahens</i>     | TtrELMOX | ELMOD_B | AMSG_01964.1   |                                            |
| <i>Thecamonas trahens</i>     | TtrELMOY | ELMOD3  | AMSG_10099.1   |                                            |
| <i>Thecamonas trahens</i>     | TtrELMOZ | ELMOD_A | AMSG_05642.1   |                                            |
| <i>Sphaeroforma arctica</i>   | SaELMOZ  | ELMOD_A | SARC_01169.1   |                                            |
| <i>Ciona intestinalis</i>     | CiELMOZ  | ELMO    |                | Cioin2 299311 estExt_fggenes3_kg.C_1560003 |
| <i>Anopheles gambiae</i>      | AgELMOZ  | ELMO    | XP_320013.2    |                                            |
| <i>Canis lupus familiaris</i> | CifELMOX | ELMO3   | XP_546883      |                                            |
| <i>Canis lupus familiaris</i> | CifELMOY | ELMO1   | XP_852411      |                                            |
| <i>Canis lupus familiaris</i> | CifELMOZ | ELMO2   | XP_866738      |                                            |
| <i>Bos taurus</i>             | BtELMOX  | ELMO1   | NP_001106698   |                                            |
| <i>Bos taurus</i>             | BtELMOY  | ELMO2   | NP_001076860   |                                            |
| <i>Bos taurus</i>             | BtELMOZ  | ELMO3   | NP_001095561   |                                            |
| <i>Tetraodon nigroviridis</i> | TnELMOW  | ELMO2   | CAF96838       |                                            |
| <i>Tetraodon nigroviridis</i> | TnELMOX  | ELMO1   | CAG10033       |                                            |
| <i>Xenopus laevis</i>         | XIELMOY  | ELMO1   | NP_001089652.1 |                                            |
| <i>Xenopus laevis</i>         | XIELMOZ  | ELMO2   | NP_001083487.1 |                                            |
| <i>Gallus gallus</i>          | GgELMOX  | ELMO1   | NP_001026165   |                                            |
| <i>Gallus gallus</i>          | GgELMOY  | ELMO2   | XP_417479      |                                            |

**Sampled organisms where no ELMOD family members were found**

*Saccharomyces cerevisiae*  
*Schizosaccharomyces pombe*  
*Acanthamoeba castellani*  
*Entamoeba histolytica*  
*Plasmodium vivax*  
*Takifugu rubripes*
